# Supplementary material for: A simple grinding-calcination approach to prepare the Co3O4–In2O3 heterojunction structure with high-performance gas-sensing property toward ethanol
Source: Royal Society of Chemistry journal article supplement (doi:10.1039/c6ra23196a), 2016-01-01
Supplement: c6ra23196a1.pdf [file c6ra23196a1.pdf]

## Supporting Information

### A simple grinding-calcination approach to prepare $\text{Co}_3\text{O}_4\text{-In}_2\text{O}_3$ heterojunction structure with high-performance gas-sensing property to ethanol

Kai Song, Xiaoqian Meng, Jianli Zhang, Yue Zhang, Xin Wang, Junwu Zhu\*

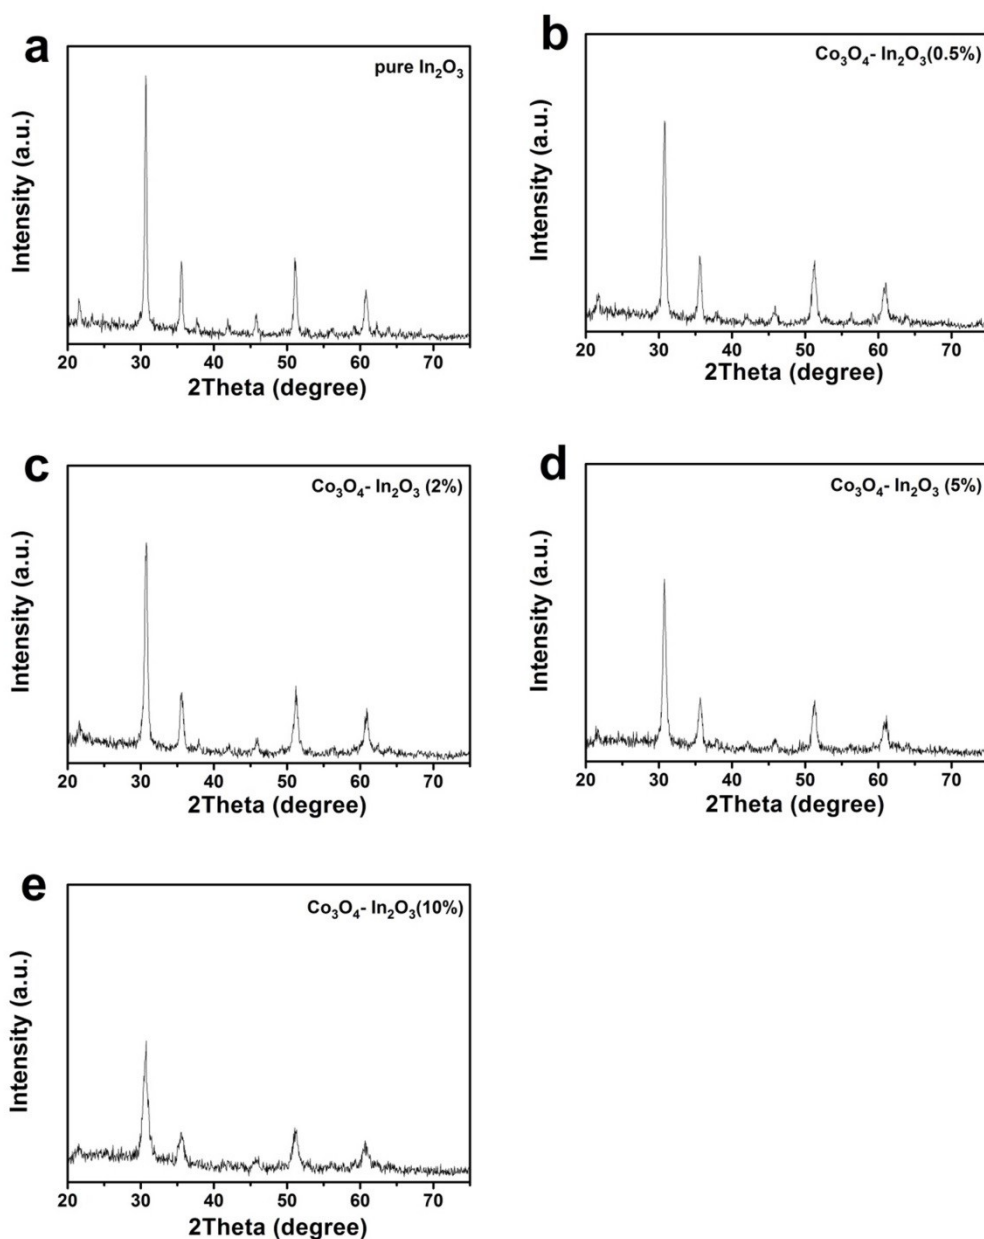

Fig. S1 XRD patterns of (a) pure  $\text{In}_2\text{O}_3$ , (b)  $\text{Co}_3\text{O}_4\text{-In}_2\text{O}_3$  (0.5%), (c)  $\text{Co}_3\text{O}_4\text{-In}_2\text{O}_3$  (2%), (d)  $\text{Co}_3\text{O}_4\text{-In}_2\text{O}_3$  (5%) and (e)  $\text{Co}_3\text{O}_4\text{-In}_2\text{O}_3$  (10%).

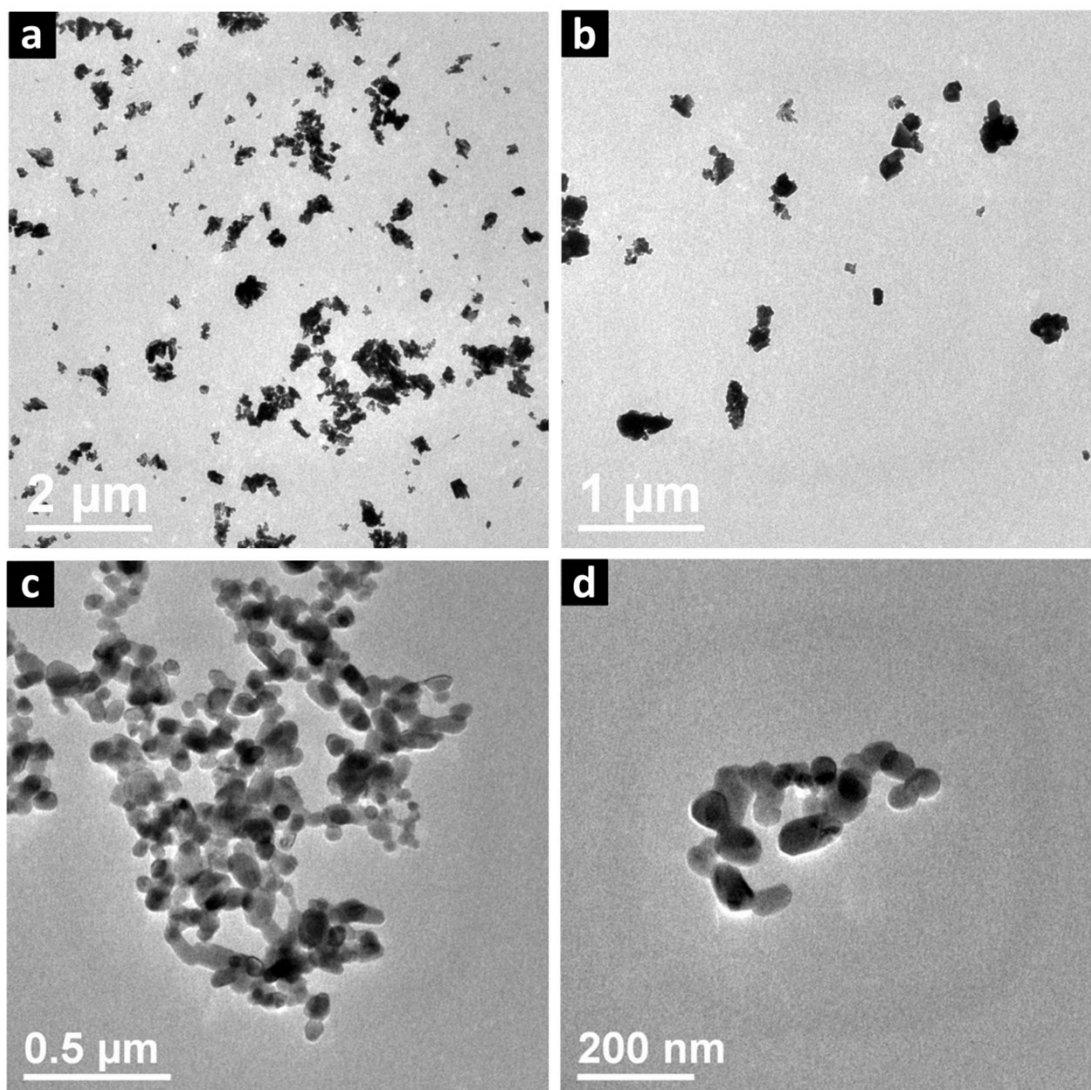

Fig. S2 TEM images of (a, b) pure  $\text{In}_2\text{O}_3$  nanoparticles and (c, d) pure  $\text{Co}_3\text{O}_4$  nanoparticles.

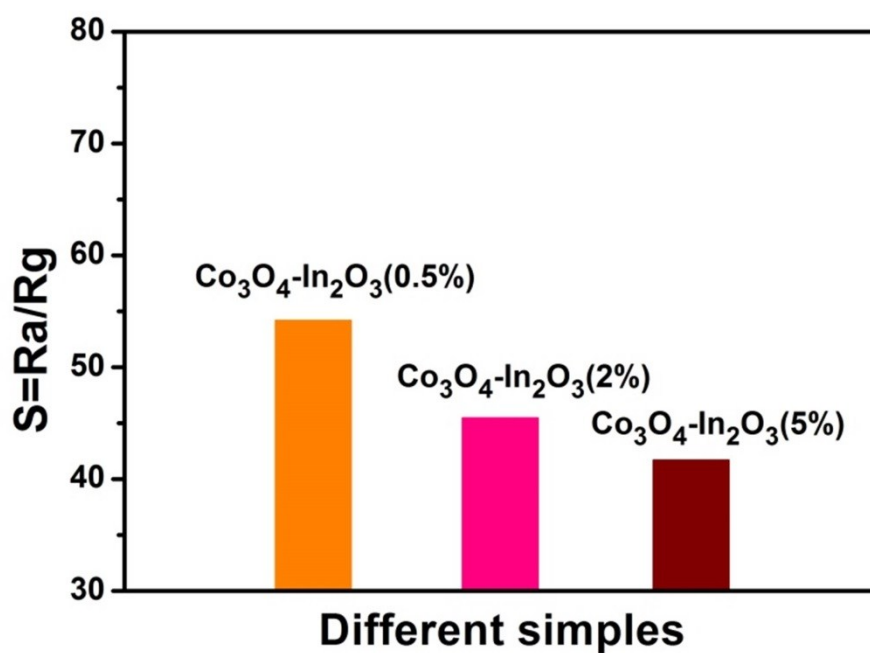

Fig. S3 The response of samples with some other different contents of  $\text{Co}_3\text{O}_4$  towards 100 ppm ethanol.

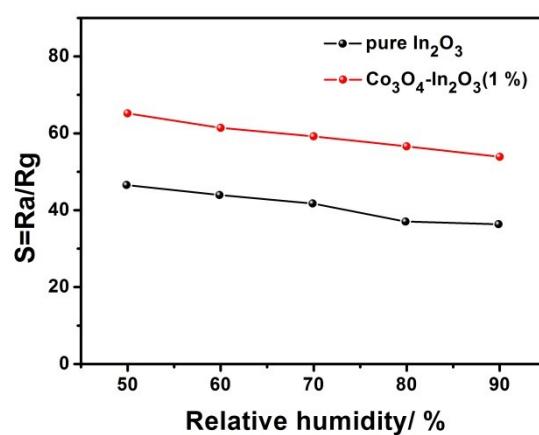

Fig. S4 The response of pure  $\text{In}_2\text{O}_3$  and  $\text{Co}_3\text{O}_4\text{-In}_2\text{O}_3$  (10 %) towards 100 ppm ethanol in different humidity.
